# Supplementary material
Source: PubMed Central journal article supplement (PMC7396873)
Supplement: EMBJ-39-e104915-s001.pdf [file EMBJ-39-e104915-s001.pdf]

## Appendix for

### **E3 ligases SNIPER1 and SNIPER2 broadly regulate the homeostasis of plant sensor NLR immune receptors**

Zhongshou Wu<sup>1,2</sup>, Meixuezi Tong<sup>1,2</sup>, Lei Tian<sup>1,2</sup>, Chipan Zhu<sup>1,2</sup>, Xue-Ru Liu<sup>1,2</sup>, Yuelin Zhang<sup>2</sup>  
and Xin Li<sup>1,2\*</sup>

<sup>1</sup>Michael Smith Laboratories, University of British Columbia, Vancouver, BC V6T 1Z4, Canada

<sup>2</sup>Department of Botany, University of British Columbia, Vancouver, BC V6T 1Z4, Canada

Zhongshou Wu ORCID ID: 0000-0001-6687-1675

\*For correspondence: [xinli@mssl.ubc.ca](mailto:xinli@mssl.ubc.ca) ORCID ID: 0000-0002-6354-2021

**Running title:** Global control of NLRs by ubiquitination

## **Table of Contents**

- 1. Appendix Figure S1. *SNIPER1* expression is induced by pathogen.**
- 2. Appendix Figure S2. *SNIPER1* gene expression in the *snc2-1D eds5 npr1 SNIPER1* overexpression lines. In the triple mutant, *eds5 npr1* is used to overcome the sterility of *snc2-1D*.**
- 3. Appendix Figure S3. Overexpression of *SNIPER1* does not affect sNLRs transcript levels.**
- 4. Appendix Figure S4. Growth of *P.s.t. avrRps4, avrRpt2* and *avrRpm1* on four-week-old leaves of the indicated genotypes at 0 dpi with bacterial inoculum of OD600 = 0.0001 for Figure 5.**
- 5. Appendix Figure S5. *SNIPER2* exhibits E3 ligase activity and overexpression of *SNIPER2* fully suppresses both TNL- and CNL-mediated autoimmunity.**
- 6. Appendix Figure S6. *SNIPER2 OE* lines are late flowering and exhibit pleiotropic alterations in leaf development.**
- 7. Appendix Figure S7. Schematic description of CRISPR/Cas9 construct design (A) and PCR genotyping (B) of mutants.**
- 8. Appendix Figure S8. Subcellular localization of *SNIPER1*-GFP and *SNIPER2*-GFP.**
- 9. Appendix Figure S9. AtHSP90.3 protein level is not altered by *SNIPER1* overexpression.**
- 10. Appendix Table S1. The list of primers used in this study**



## **Table of Contents**

- 1. Appendix Figure S1. *SNIPER1* expression is induced by pathogen.**
- 2. Appendix Figure S2. *SNIPER1* gene expression in the *snc2-1D eds5 npr1 SNIPER1* overexpression lines. In the triple mutant, *eds5 npr1* is used to overcome the sterility of *snc2-1D*.**
- 3. Appendix Figure S3. Overexpression of *SNIPER1* does not affect sNLRs transcript levels.**
- 4. Appendix Figure S4. Growth of *P.s.t. avrRps4, avrRpt2* and *avrRpm1* on four-week-old leaves of the indicated genotypes at 0 dpi with bacterial inoculum of OD600 = 0.0001 for Figure 5.**
- 5. Appendix Figure S5. *SNIPER2* exhibits E3 ligase activity and overexpression of *SNIPER2* fully suppresses both TNL- and CNL-mediated autoimmunity.**
- 6. Appendix Figure S6. *SNIPER2 OE* lines are late flowering and exhibit pleiotropic alterations in leaf development.**
- 7. Appendix Figure S7. Schematic description of CRISPR/Cas9 construct design (A) and PCR genotyping (B) of mutants.**
- 8. Appendix Figure S8. Subcellular localization of *SNIPER1*-GFP and *SNIPER2*-GFP.**
- 9. Appendix Figure S9. AtHSP90.3 protein level is not altered by *SNIPER1* overexpression.**
- 10. Appendix Table S1. The list of primers used in this study**

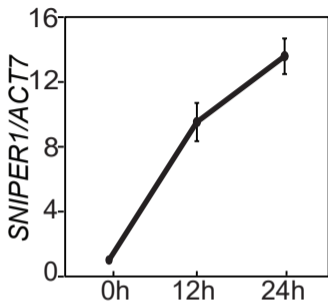

**Appendix Figure S1. *SNIPER1* expression is induced by pathogen.**

RT-PCR analysis of the expression of *SNIPER1* after *P.s.m.* ES4326 infection. Samples were collected at 0, 12 h and 24 h after *P.s.m.* ES4326 infection. Values were normalized to the level of *ACTIN7*. Error bars represent means  $\pm$  SD (n = 3).

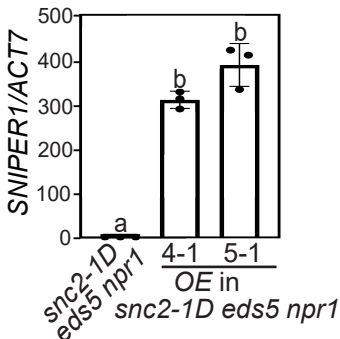

**Appendix Figure S2. *SNIPER1* gene expression in the *snc2-1D eds5 npr1* *SNIPER1* overexpression lines. In the triple mutant, *eds5 npr1* is used to overcome the sterility of *snc2-1D*.**

*SNIPER1* gene expression in the indicated plants as determined by RT-PCR. Statistical significance is indicated by different letters ( $p < 0.01$ ). Error bars represent means  $\pm$  SD ( $n = 3$ ). Two independent experiments were carried out with similar results.

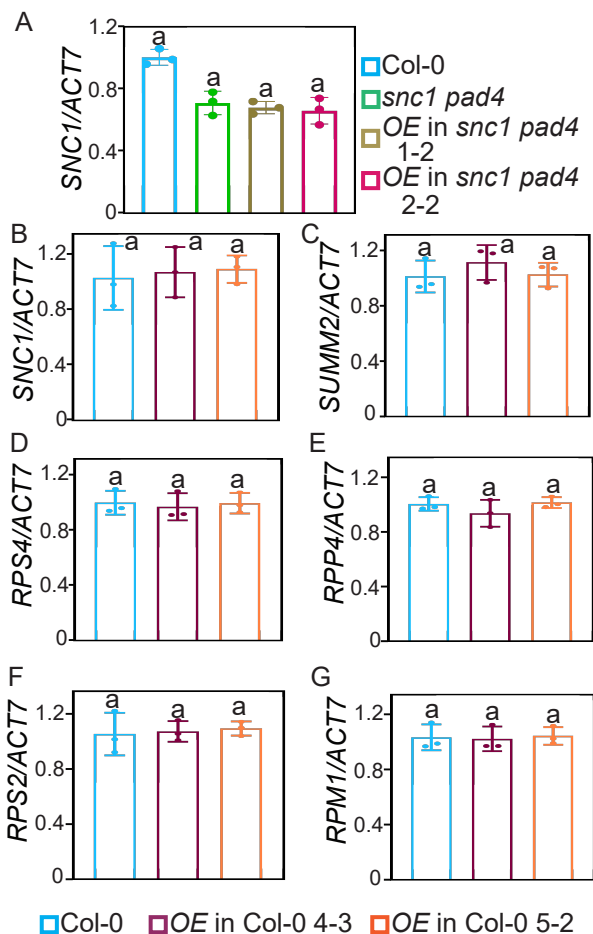

**Appendix Figure S3. Overexpression of *SNIPER1* does not affect sNLRs transcript levels.** RT-PCR analysis of the expression of *SNC1* (A-B), *SUMM2* (C), *RPS4* (D), *RPP4* (E), *RPS2* (F) and *RPM1* (G) in the indicated genotypes. Statistical significance is indicated by different letters ( $p < 0.01$ ). Error bars represent means  $\pm$  SD ( $n=3$ ). At least two independent experiments were carried out with similar results. Color squares shown on the bottom are for B-G.

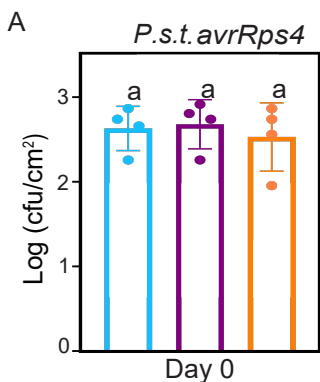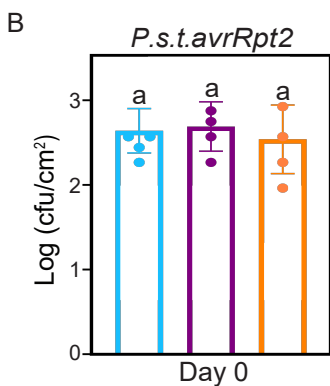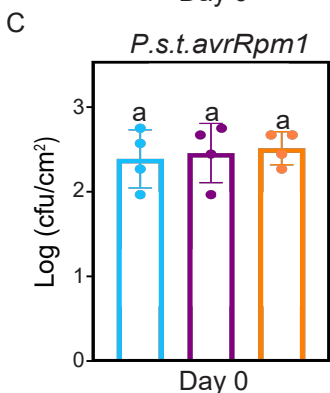

□ Col-0    □ OE in Col-0 4-3    □ OE in Col-0 5-2

**Appendix Figure S4. Growth of *P.s.t. avrRps4*, *avrRpt2* and *avrRpm1* on four-week-old leaves of the indicated genotypes at 0 dpi with bacterial inoculum of OD600 = 0.0001 for Figure 5. Statistical significance is indicated by different letters ( $p < 0.01$ ).**

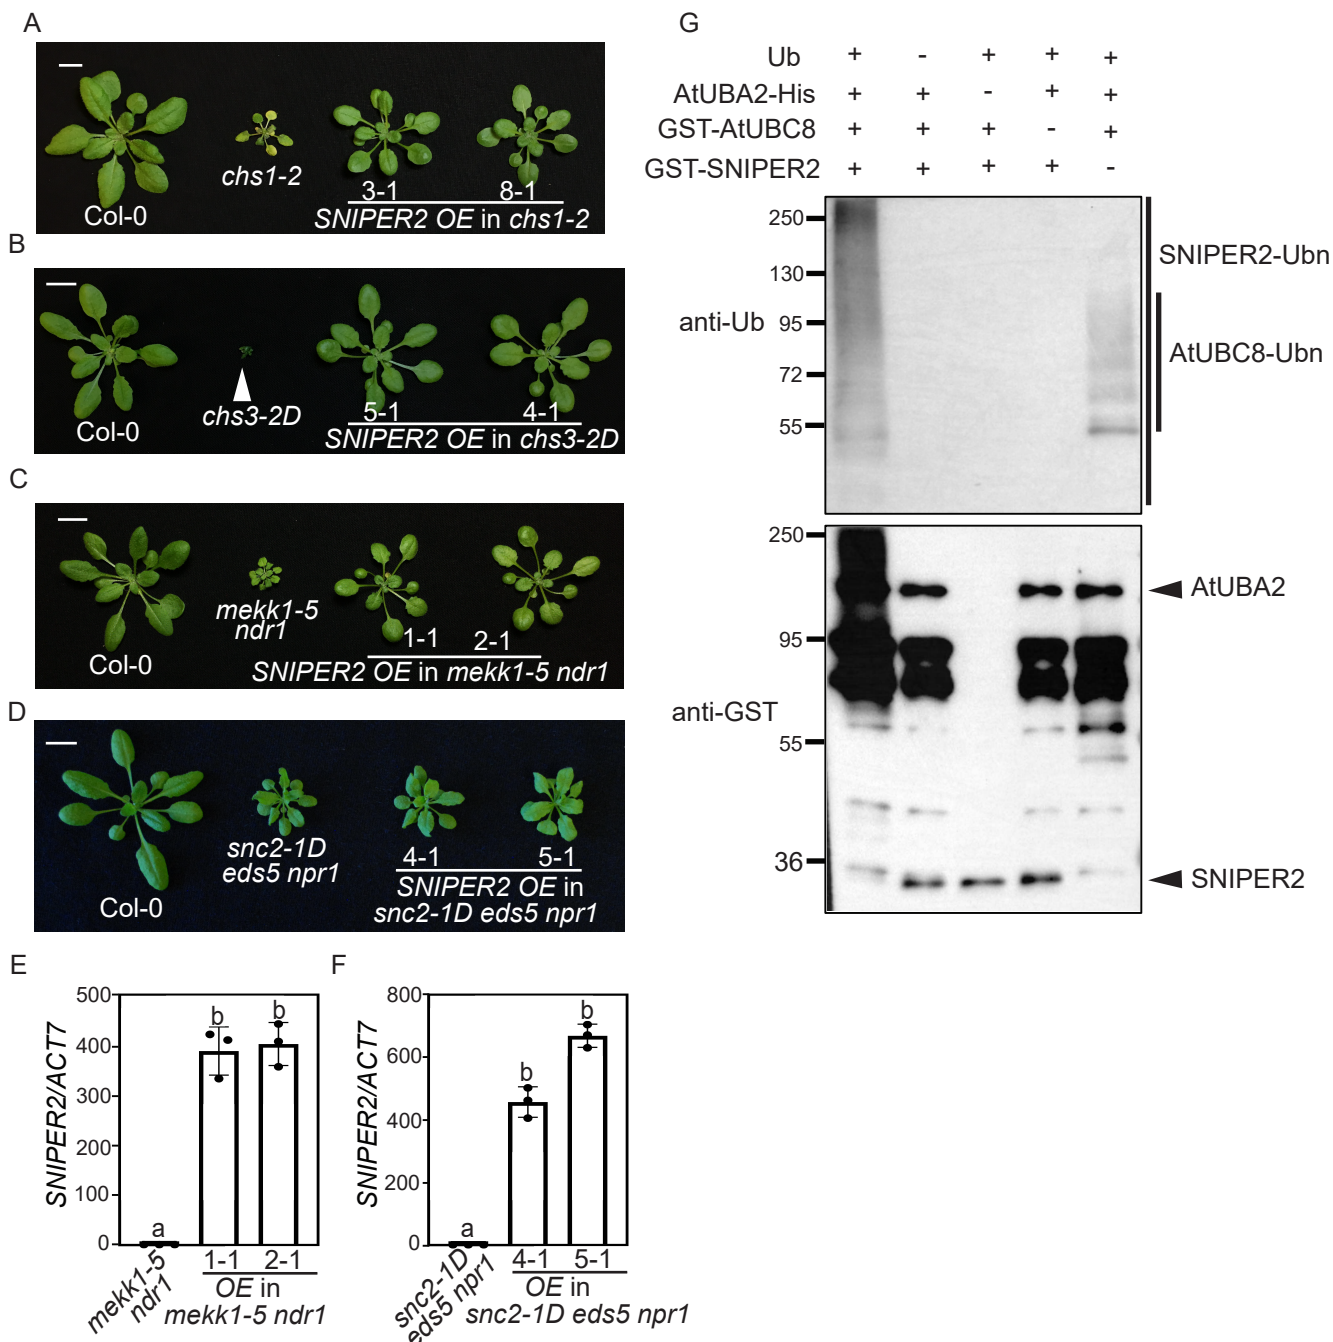

**Appendix Figure S5. SNIPER2 exhibits E3 ligase activity and overexpression of SNIPER2 fully suppresses both TNL- and CNL-mediated autoimmunity.**

A. Morphology of four-week-old soil-grown plants of Col-0, *chs1-2* and two independent transgenic lines of *SNIPER2* OE into *chs1-2* background. Plants were grown at 16 °C under long day conditions. Bar = 1cm.

B-D. Morphology of four-week-old soil-grown plants of Col-0, *chs3-2D* (B), *mekk1-5 ndr1* (C), *snc2-1D eds5 npr1* (D) and two independent transgenic lines of *SNIPER2* OE into *chs3-2D* (B), *mekk1-5 ndr1* (C), and *snc2-1D eds5 npr1* (D) backgrounds. Bar = 1cm

E-F. *SNIPER2* gene expression in the indicated plants as determined by RT-PCR. Statistical significance is indicated by different letters ( $p < 0.01$ ). Error bars represent means  $\pm$  SD ( $n = 3$ ). Two independent experiments were carried out with similar results.

G. *In vitro* ubiquitination assay using *E. coli*-expressed *SNIPER2* (E3), AtUBC8 (E2), AtUBA2 (E1) and/or Ubiquitin. The molecular mass markers are indicated on the left (kDa). Ubiquitination was detected by immunoblotting with an anti-ubiquitin antibody. AtUBA2 and *SNIPER2* were detected by immunoblotting with anti-GST antibody.

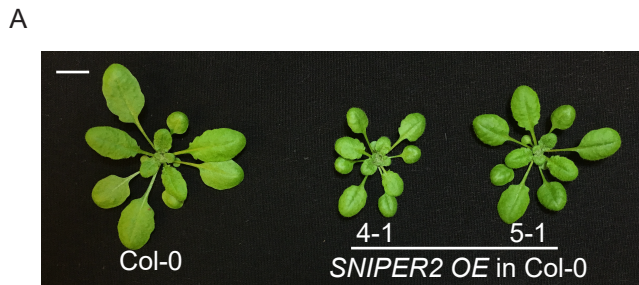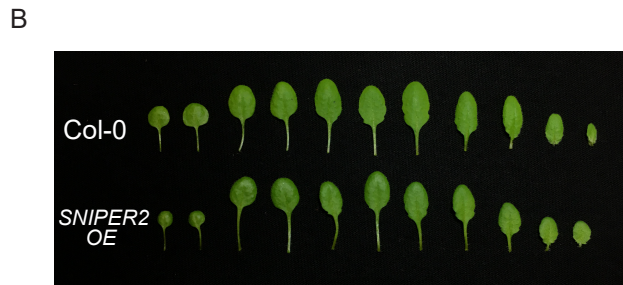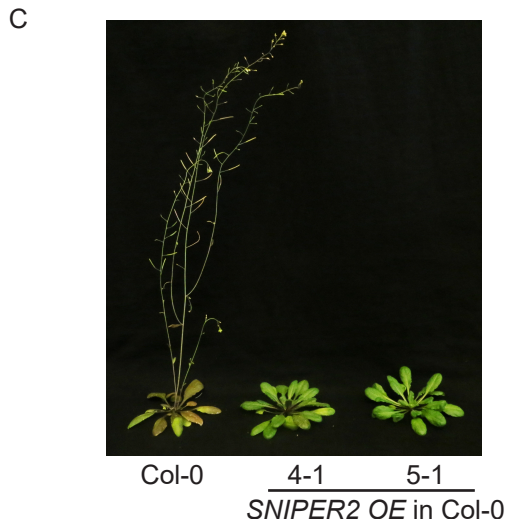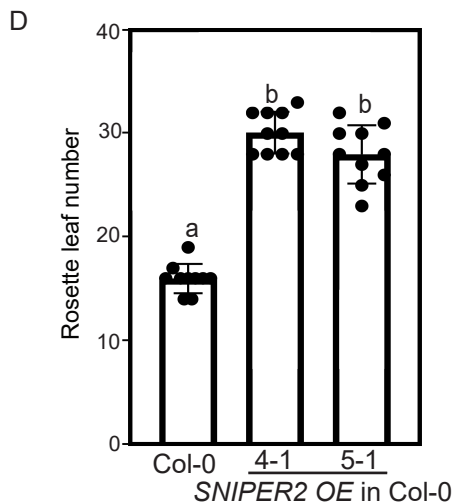

**Appendix Figure S6. *SNIPER2* OE lines are late flowering and exhibit pleiotropic alterations in leaf development.**

A. Morphology of four-week-old soil-grown plants of Col-0 and two independent transgenic lines of *SNIPER2* OE into Col-0 background. Bar = 1cm.

B. Rosette leaves of Col-0 and *SNIPER2* OE plants grown under LD conditions. All leaves, including cotyledons, are shown in order of production from the first true leaf.

C. Morphology of eight-week-old soil-grown plants of Col-0 and two independent transgenic lines of *SNIPER2* OE into Col-0 background grown under long day conditions.

D. Quantification of flowering time under long day conditions by counting the number of leaves produced at bolting. Error bars represent means  $\pm$  SD (n = 10). Three independent experiments were carried out with similar results.

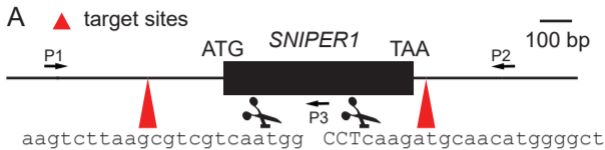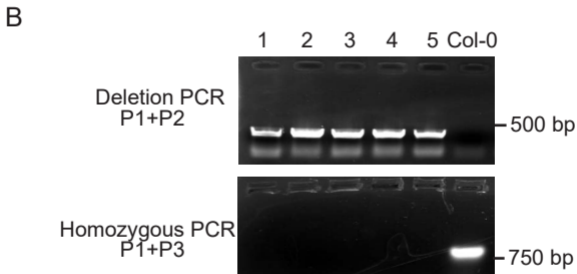

**Appendix Figure S7. Schematic description of CRISPR/Cas9 construct design (A) and PCR genotyping (B) of mutants.**



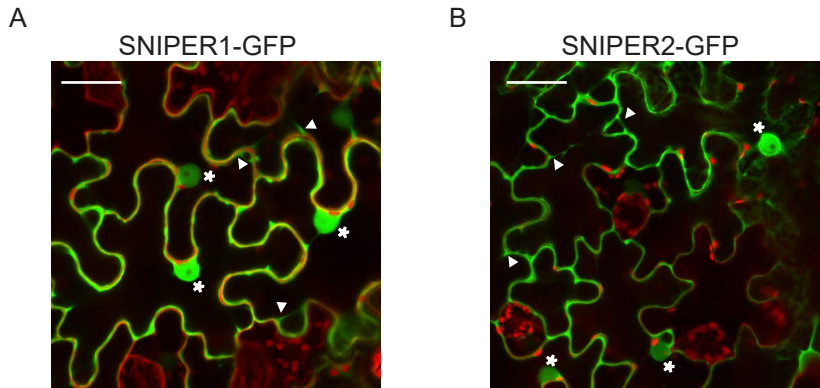

**Appendix Figure S8. Subcellular localization of SNIPER1-GFP and SNIPER2-GFP.**

Confocal images of SNIPER1-GFP (A) and SNIPER2-GFP (B) fluorescence in *N. benthamiana* leaves. The nuclear areas are indicated by white arrowheads. white asterisks indicate location of cytosol. Bar = 25  $\mu\text{m}$ .

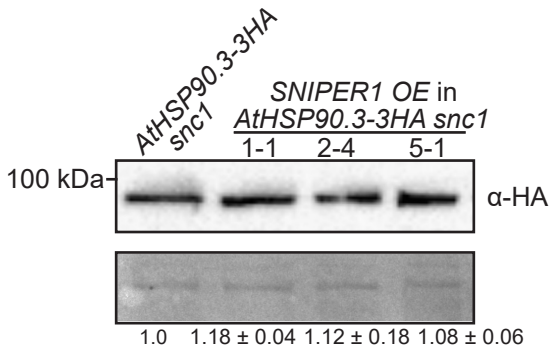

**Appendix Figure S9. AtHSP90.3 protein level is not altered by *SNIPER1* overexpression.**

Western blot analysis of AtHSP90.3-3HA protein level in stable transgenic *Arabidopsis* lines overexpressing *SNIPER1* in *AtHSP90.3-3HA snc1* background. Equal loading is shown by Ponceau S staining of a non-specific band. The numbers below represent normalized band intensity  $\pm$  SD (n = 2). Molecular mass marker in kilo Daltons is indicated on the left. Two independent experiments were carried out with similar results.

Appendix Table S1. The list of primers used in this study

| Name                     | Sequence                                  | Purpose                            |
|--------------------------|-------------------------------------------|------------------------------------|
| U4h-EcoRI-F              | ccggaattcATGTCTTCTGAGAATGATT              | pHAN SNIPER1<br>OE construct       |
| U4h-BamHI-R              | cgcgatccTTAGTTTCTTCTGTGCGCCGGC            |                                    |
| U4h H129YF               | GAGATGCCTTGTAATAT AAGTTTCACTCAA           | DN form of<br>SNIPER1              |
| U4h H129YR               | TTGAGTGAAACTTATTTTTACAAGGCATCTC           |                                    |
| U4h-KpnI-F               | gcgcggtaccATGTCTTCTGAGAATGATT             | Cluc/HATurobI<br>D vector          |
| U4h-SpeI(no stop)-R      | gactagtcGTTTCTTCTGTGCGCCGGCGTT            |                                    |
| U4h-SfiI-F               | CCCGGCCGTCAAGGCCa ATGTCTTCTGAGAATG<br>ATT | pGST1FLAG-<br>SNIPER1              |
| U4h-SfiI-R               | GCCGGCCCATGAGGCCTTAGTTTCTTCTGTGCG<br>CGG  |                                    |
| U4hZZ-BamHI-F            | cgcgatccATGTCTTCTGAGAATGATT               | pACYCDuet<br>vector                |
| U4HstuI (ns)-R           | GAAGGCCTGTTTCTTCTGTGCGCCGGCGTT            |                                    |
| SALKseq_28010_U4h_<br>LP | TCCAAGGTTCTGTGATGATCG                     | <i>sniper1-1</i><br>genotyping PCR |
| SALKseq_28010_U4h_<br>RP | cccattgtgcatcttgagg                       |                                    |
| SUMM2-DraIII-F           | cggcggCACTCAGTGATGGGAGCTTGTTAACT          | Nluc/FLAG<br>vector                |
| SUMM2-DraIII(ns)-R       | cggcggCACTCAGTGCCGCACATAACTAATTGC         |                                    |
| SUMM2(NB)-EcoRI-F        | CGGAATTCATGGAAACAATGCTCGAAAGG             | Nluc/FLAG/GS<br>T-HA vector        |
| SUMM2(NB)-BamHI-<br>NF   | cgcgatccATGGAAACAATGCTCGAAAGG             |                                    |
| SUMM2(NB)-StuI-R         | GAAGGCCTATTTTCATCTATGAATCCCT              |                                    |
| RPP4-KpnI-F              | gcgcggtaccATGGCTTCTTCTTCTTCTTC            | Nluc/FLAG<br>vector                |
| RPP4-SalI (ns)-R         | CGCGTCGACTATCAACATCAGCATCATCA             |                                    |
| RPP4(NB)-EcoRI-NF        | CGGAATTCATGGGTGACTTCGTCGGAATTG            | Nluc/FLAG/GS<br>T-HA vector        |
| RPP4(NB)-KpnI-F          | gcgcggtaccATGGGTGACTTCGTCGGAATTG          |                                    |
| RPP4(NB)-StuI-R          | GAAGGCCTGACGTTACTGACTTTAAAACC             |                                    |
| <u>CHS1(NB)-EcoRI-F</u>  | CGGAATTCATGCGTCACATGAAAGCATTGTA           | Nluc/FLAG/GS<br>T-HA vector        |
| CHS1(NB)-BamHi-NF        | cgcgatccATGCGTCACATGAAAGCATTGTA           |                                    |

|                     |                                                |                                    |
|---------------------|------------------------------------------------|------------------------------------|
| CHS1(NB)-StuI-R     | GAAGGCCTCATAATCTTCCAAACTTCCT                   |                                    |
| RPP4-RT-F           | AACTCAGCCACTTGGAAG                             | RT PCR                             |
| RPP4-RT-R           | CAAGCGACTGGATGC                                |                                    |
| Summ2-RT-F          | GGTTCTGGACTCGGAAC                              |                                    |
| Summ2-RT-R          | CCATAAGGGATGAAGAACTTG                          |                                    |
| U4H-CR-DT1-BsF      | ATATATGGTCTCGATTGaagtcttaagcgtcgtcaaGTT        | SNIPER1<br>CRISPR<br>construct     |
| U4H-CR-DT1-F0       | TGaagtcttaagcgtcgtcaaGTTTTAGAGCTAGAAATAG<br>C  |                                    |
| U4H-CR-DT2-R0       | AACcaagatgcaacatggggctAATCTCTTAGTCGACTCT<br>AC |                                    |
| U4H-CR-DT2-BsR      | ATTATTGGTCTCGAAACcaagatgcaacatggggctC          |                                    |
| 1g14200-del-NF      | AACGAGTTCCGAGAATGTCAG                          | SNIPER1<br>deletion PCR            |
| 1g14200-del-R       | CTCAAGGTAGCCACAACCA                            |                                    |
| SALKseq_63073-U4-LP | GGCGACAGAACAAGAAGCTG                           | <i>sniper2-1</i><br>genotyping PCR |
| FLAG_311D05-U4-R    | ACCATCACTGTTTCCACCG                            |                                    |
| U4-SfiI-F           | CCCGGCCGTCAAGGCCaATGGCGACAGAACAAG<br>AAG       | pGST1HA-<br>SNIPER2 OE<br>constuct |
| U4-SfiI-R           | GCCGGCCCATGAGGCCCTAATTCTCGGACTCAAC<br>AC       |                                    |
| U4-BamHI-F          | cgcgatccATGGCGACAGAACAAGAAG                    | GST-SNIPER2                        |
| U4-SalI-R           | cgcgctgacCTAATTCTCGGACTCAACAC                  |                                    |
| eds1-2 geno F       | ACAAGCCAAAGTGTC AAGCC                          | <i>eds1-2</i><br>genotyping PCR    |
| eds1-2 geno R       | CAAGCATCCCTTCTAATGTC                           |                                    |
