# Supplementary material
Source: PubMed Central journal article supplement (PMC7396873)
Supplement: EMBJ-39-e104915-s007.pdf [file EMBJ-39-e104915-s007.pdf]

Figure 8

A

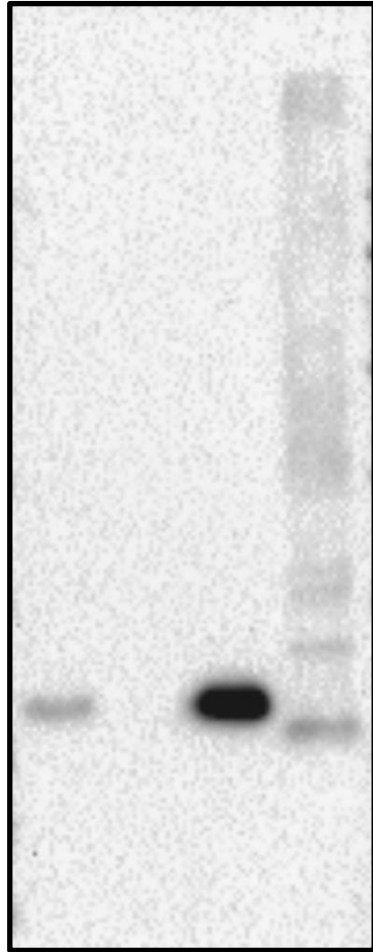

$\alpha$ -myc

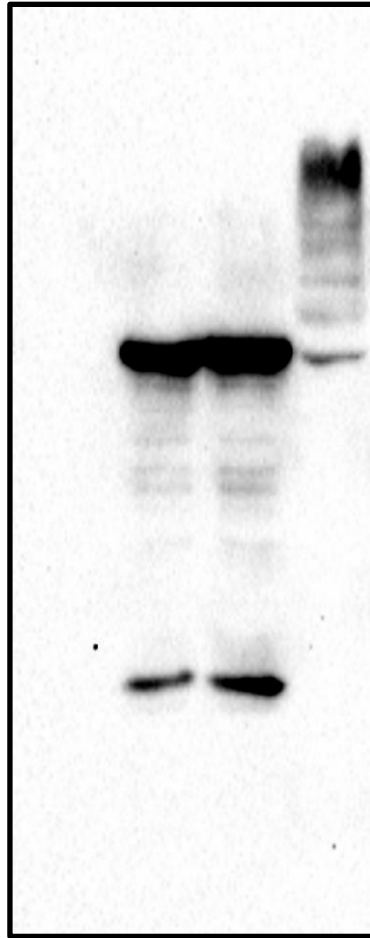

$\alpha$ -HA

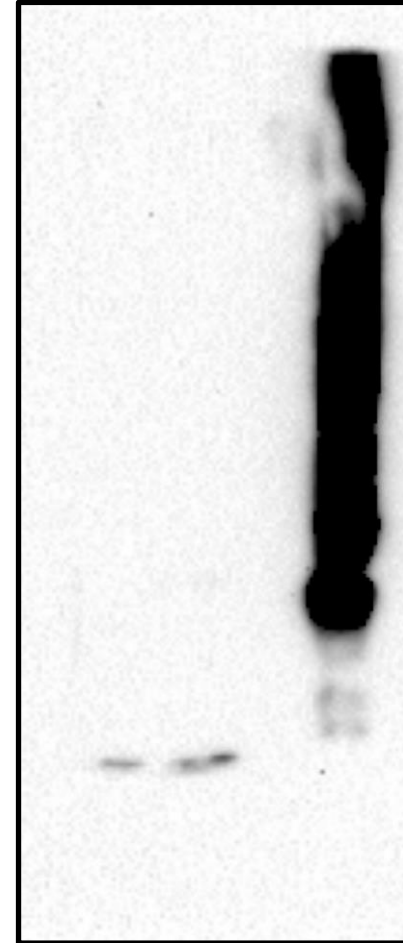

$\alpha$ -FLAG

B

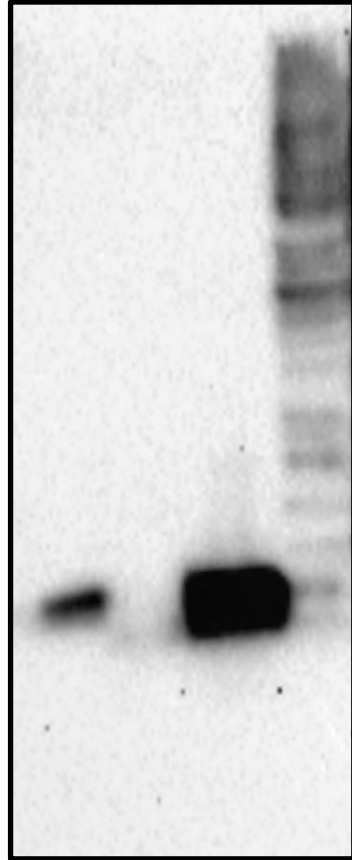

$\alpha$ -myc

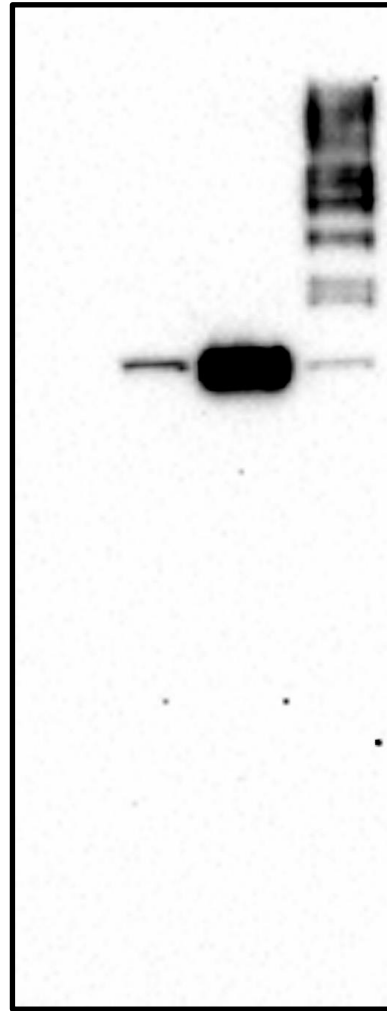

$\alpha$ -HA

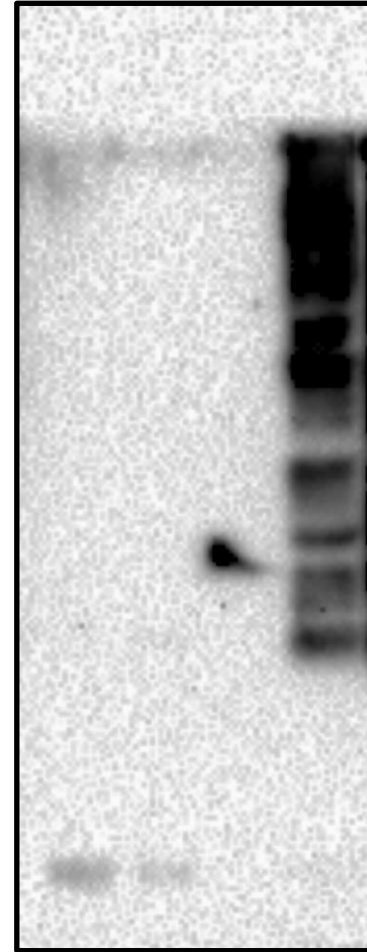

$\alpha$ -FLAG

C

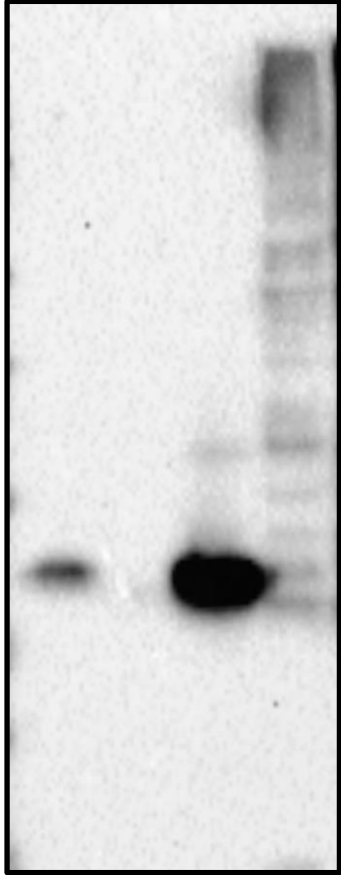

$\alpha$ -myc

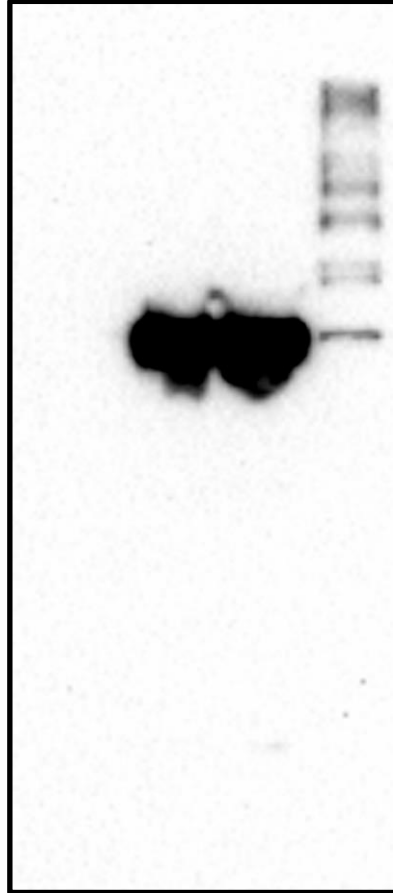

$\alpha$ -HA

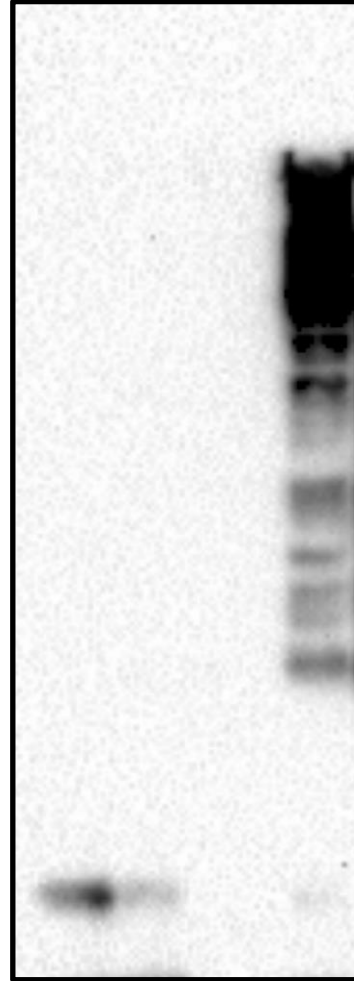

$\alpha$ -FLAG
