# Supplementary material
Source: PubMed Central journal article supplement (PMC7396873)

Figure 3E

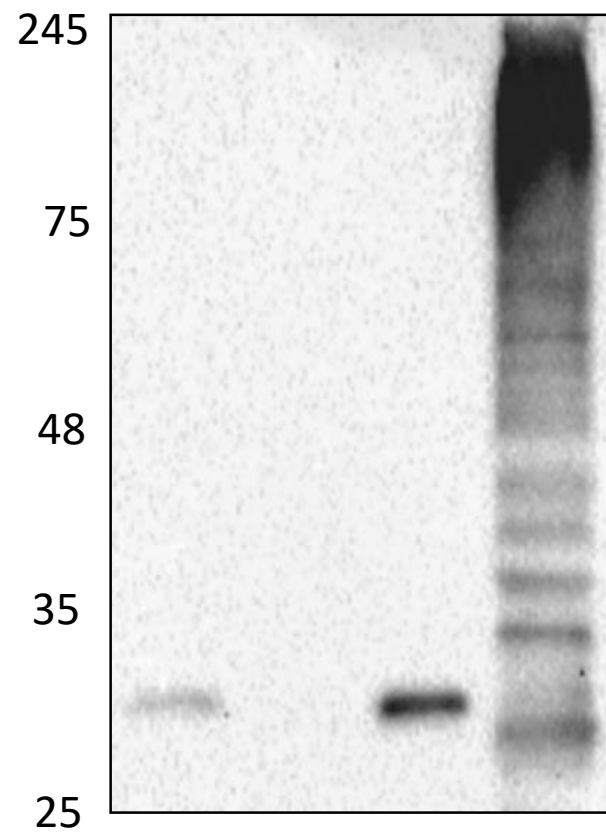

$\alpha$ -myc

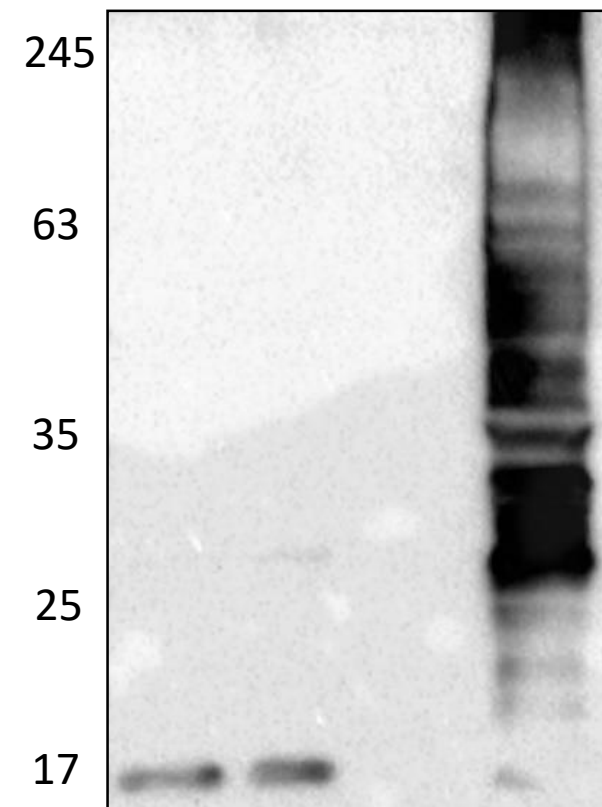

$\alpha$ -FLAG

Supplement: EMBJ-39-e104915-s003.pdf [file EMBJ-39-e104915-s003.pdf]

Figure 4

A

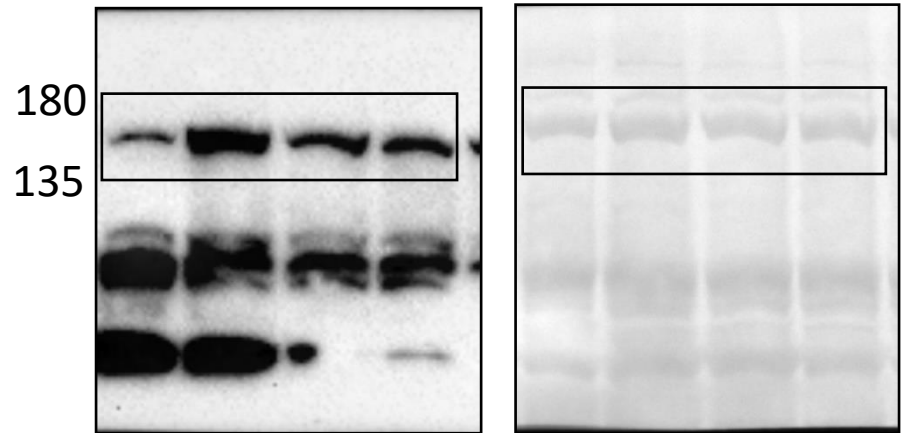

$\alpha$ -SNC1

B

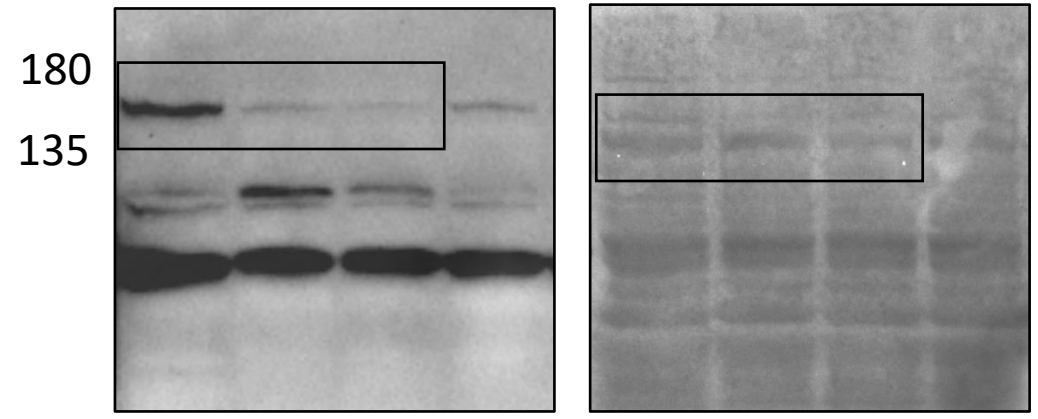

$\alpha$ -SNC1

C

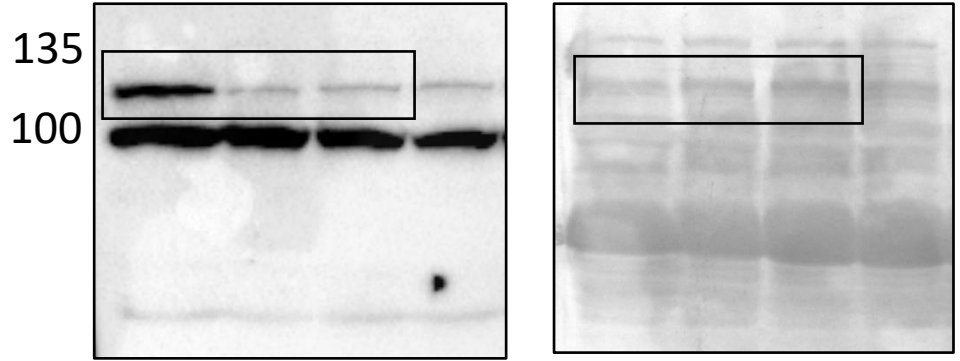

$\alpha$ -HA

D

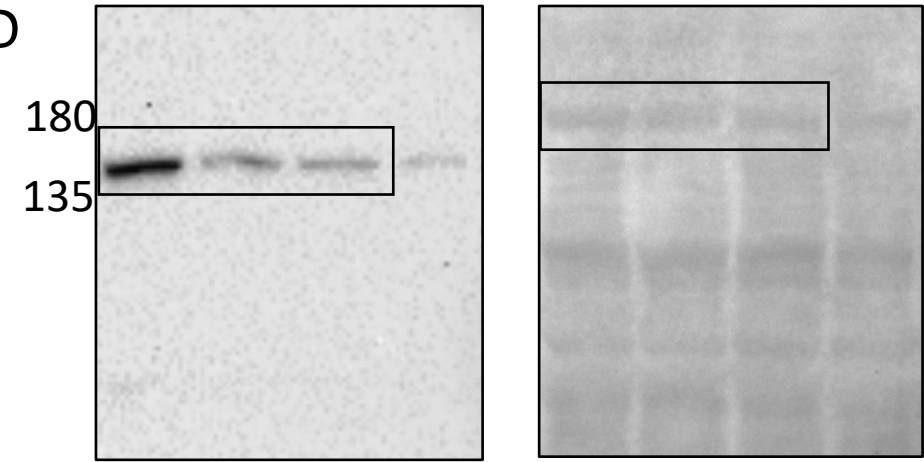

$\alpha$ -HA

E

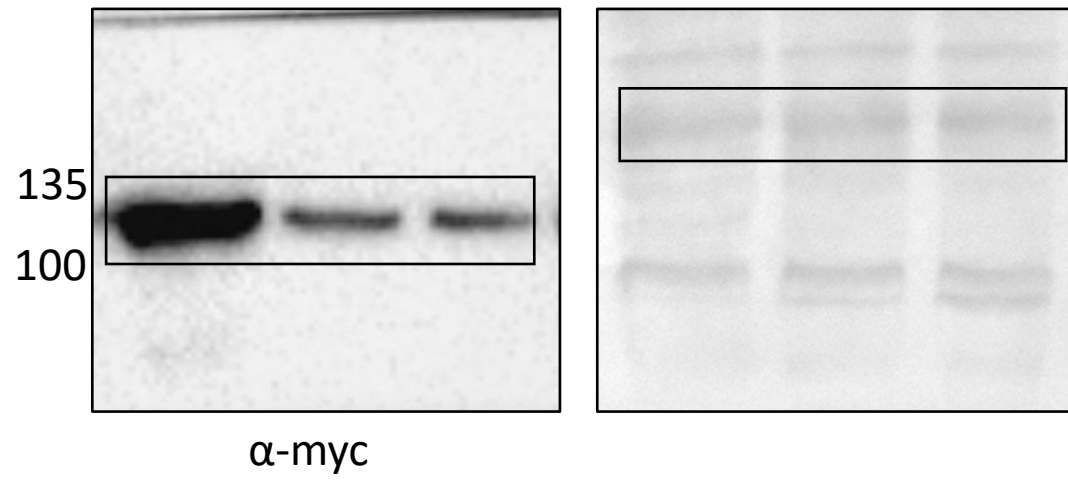

F

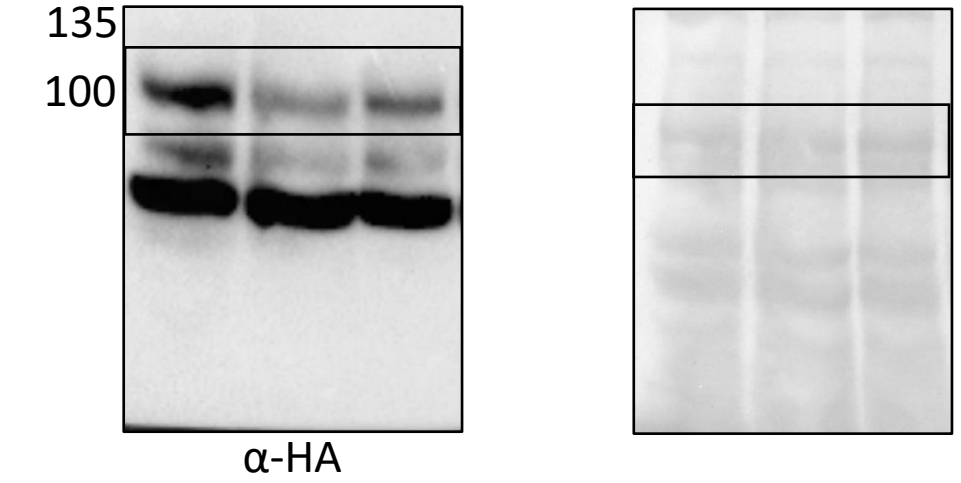

G

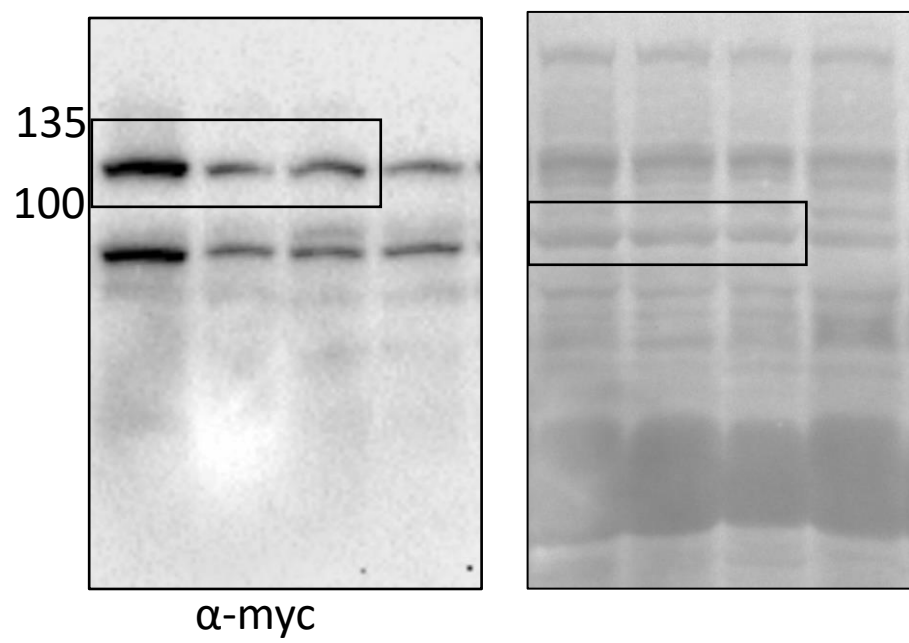

Supplement: EMBJ-39-e104915-s004.pdf [file EMBJ-39-e104915-s004.pdf]

Figure 6

E

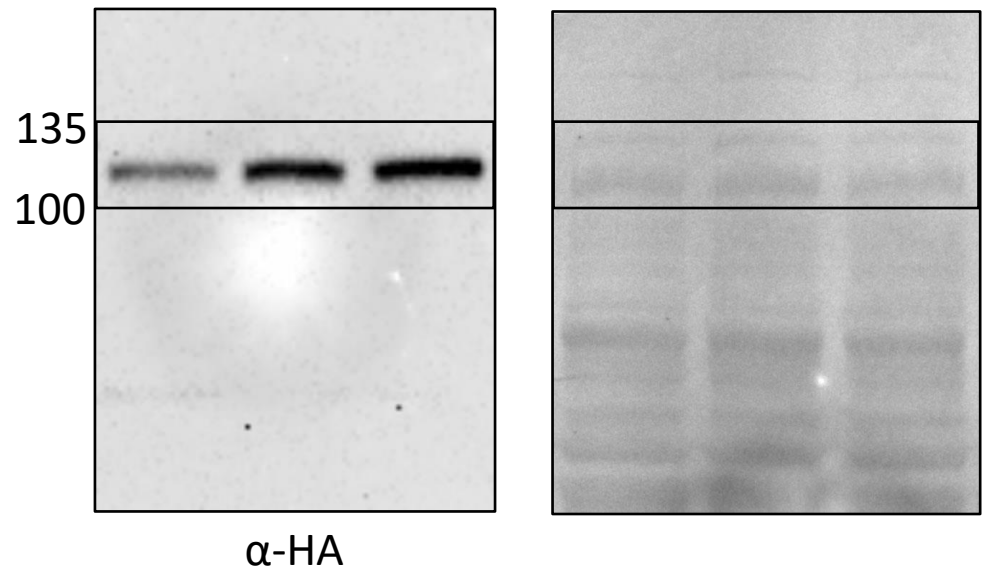

G

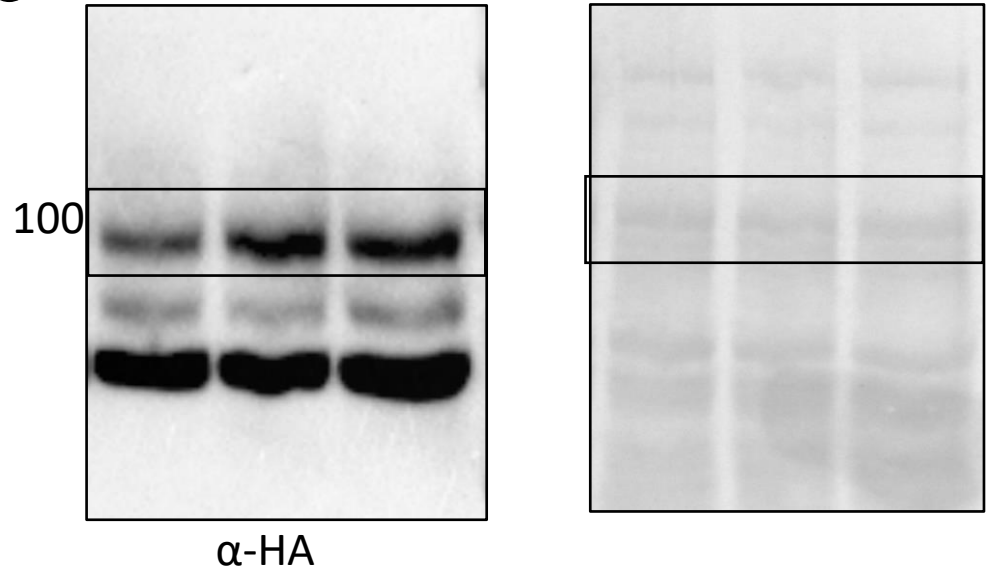

F

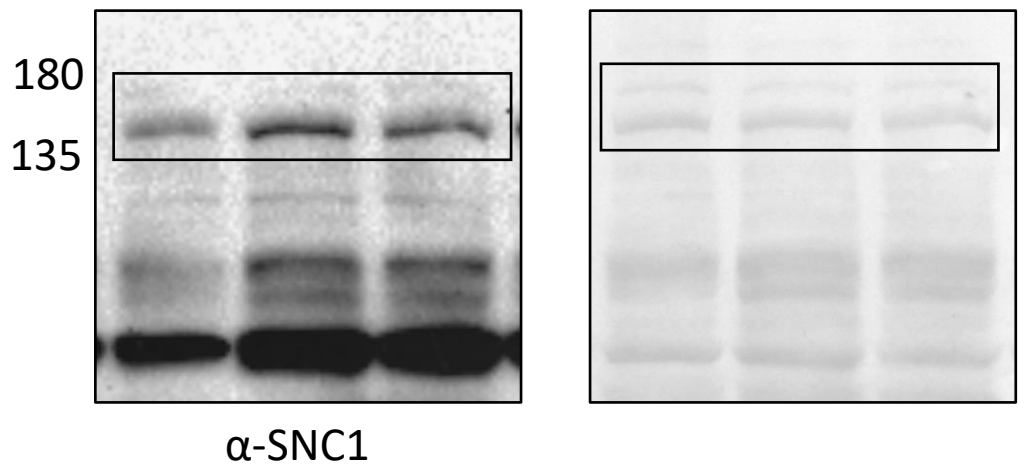

H

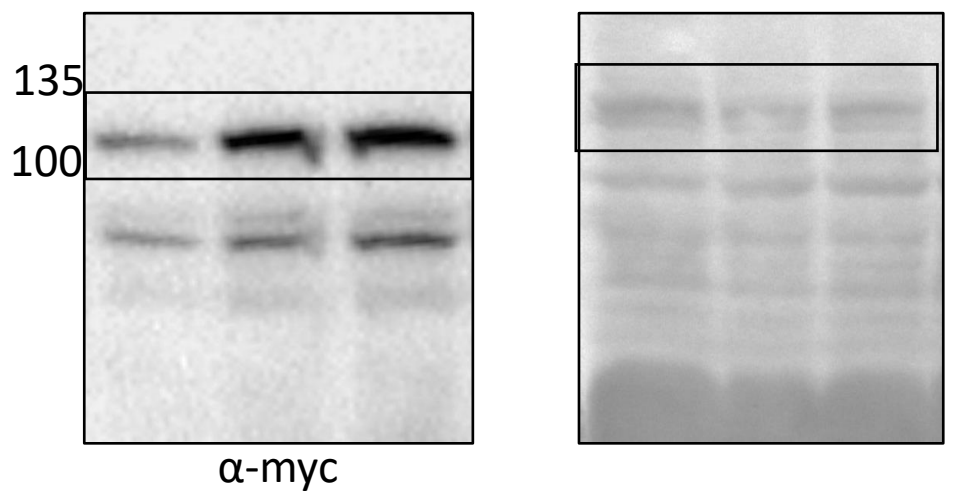

Supplement: EMBJ-39-e104915-s005.pdf [file EMBJ-39-e104915-s005.pdf]

Figure 7

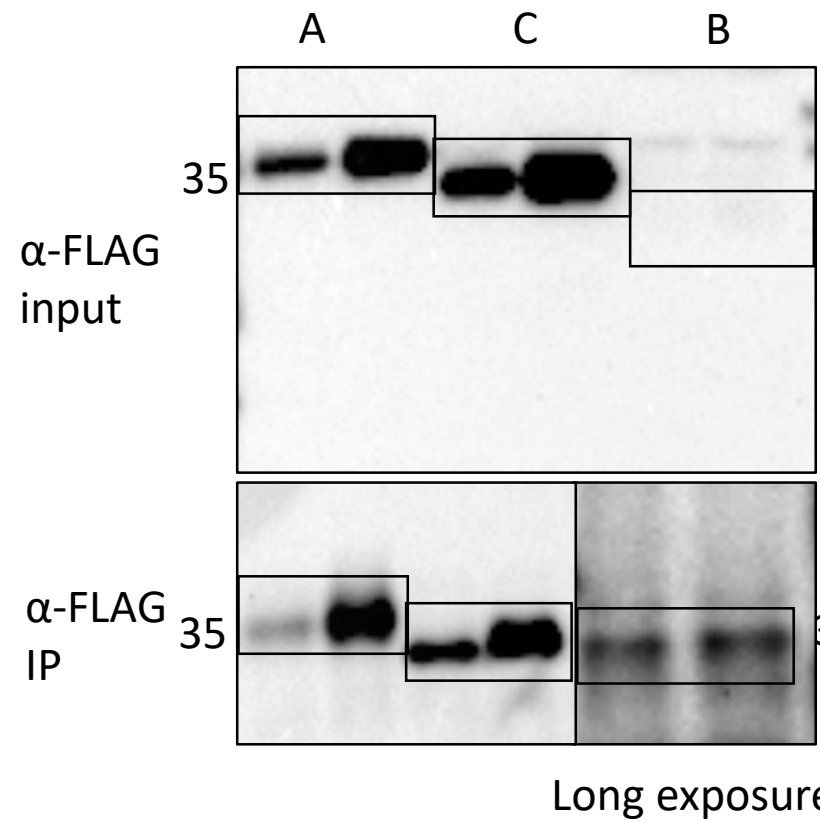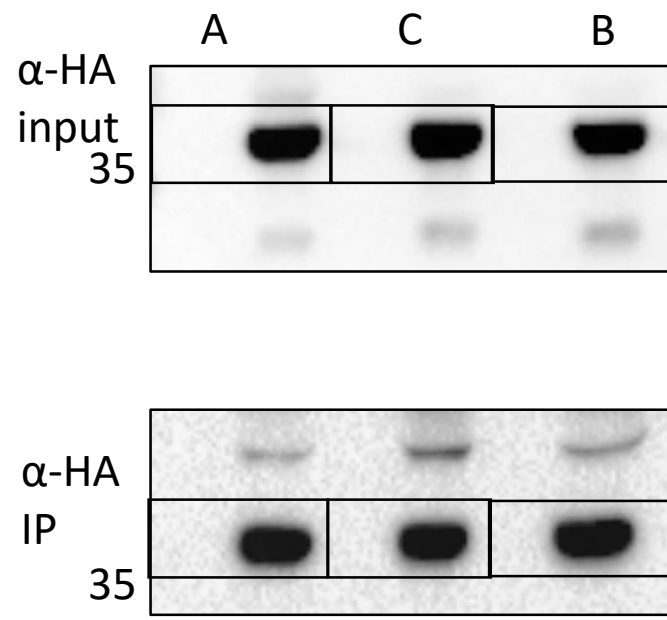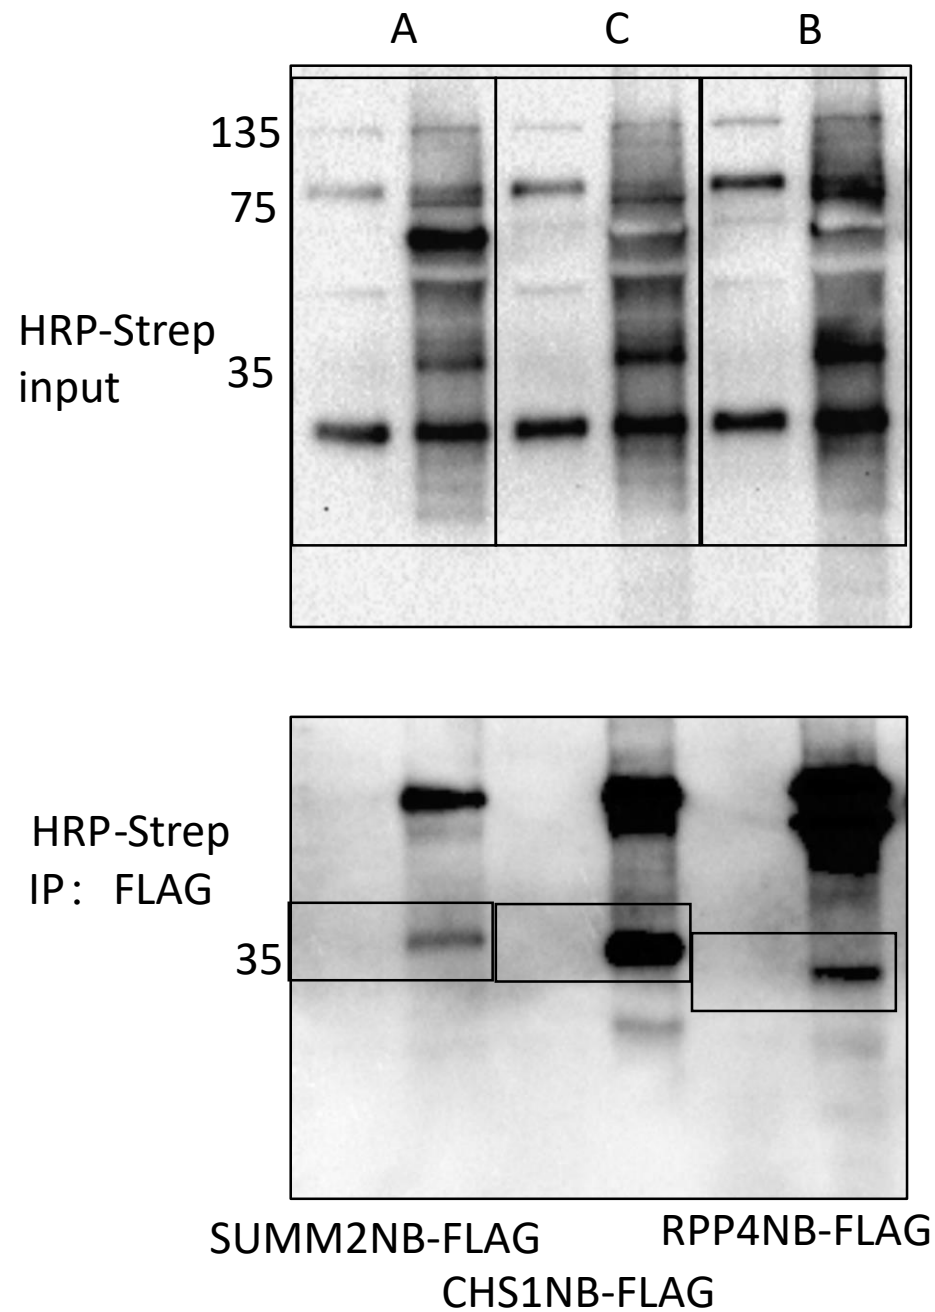

Supplement: EMBJ-39-e104915-s006.pdf [file EMBJ-39-e104915-s006.pdf]
